# Supplementary material for: Immunopathogenesis of Emerging Candida auris and Candida haemulonii Strains
Source: MDPI journal article supplement (doi:10.3390/jof7090725), 2021-09-05
Supplement: s1 [file s1]

**Table S1.** Primers used for qPCR experiments in this study.

| Primer      | Sequence (5' – 3')      | Reference |
|-------------|-------------------------|-----------|
| B-actin_F   | GCTGACAGGATGCAGAAGGA    | [66]      |
| B-actin_R   | TAGAAGCATTTGCGGTGGAC    |           |
| IL1-B_F     | TTGTGGGAGACAGACAGTGC    |           |
| IL1-B_R     | GATTGGGGTTTGATGTGCTT    |           |
| TNF-a_F     | ACAAGGCAATTTCACTTCCA    |           |
| TNF-a_R     | AGCTGATGTGCAAAGACACC    |           |
| IL-10_F     | TCACGTCATGAACGAGATCC    |           |
| IL-10_R     | CACCATATCCCGCTTGAGTT    |           |
| iNOS_F      | GAGCAGGCCCAATGCATTT     |           |
| iNOS_R      | TGCGCTGCTGCCAGAAAC      |           |
| IFN-γ_F     | CTATGGGCGATCAAGGAAAA    | [67]      |
| IFN-γ_R     | CTTAGCCTGCCGTCTCTTG     |           |
| MyD88_F     | TAAACGGCTAATCCCTGTCTG   |           |
| MyD88_R     | TCGAGTCCAGAACCAGACCT    |           |
| IL-6_F      | GGACGTGAAGACACTCAGAGACG | [28]      |
| IL-6_R      | AAGGTTTGAGGAGAGGAGTGCTG |           |
| IL-17a_F    | CAATCTGAGGACGGAAGGG     |           |
| IL-17a_R    | ACTGGGCTTCAAAGATGACC    |           |
| NF-κB P65F1 | GGCAGGTGGCGATAGTGTT     | [68]      |
| NF-κB P65R1 | CATTCTTCAGTTCTCTTGCG    |           |
| jak2F1      | TCGCTGCTTCTTCTGTCAGG    |           |
| jak2R1      | ACAGCCGTCCATTTTGGCTT    |           |
| stat3F1     | CATTCCCAAAGAGGAGGCGT    |           |
| stat3R1     | ATTTGGCTCGGAGAGAAAGCA   |           |
| foxp3a_F    | ACCTCACCAAAACCAATGGC    |           |
| foxp3a_R    | TCTGATTGCGAGATGAGCCG    | [63]      |
| foxp3b_F    | GCGTGGACGAGACTTTTCT     |           |
| foxp3b_R    | GCAGCTGAAGAACTGCATTC    |           |
| mpx_F       | TTCCAGAAAATCCGAGATGG    |           |
| mpx_R       | CCATTGACACAGAAGCCAGA    | [22]      |
| IL-8_F      | TTTCCTGGCATTCTGACC      |           |
| IL-8_R      | CGTCGGCTTTCTGTTTCAAT    |           |
| mmp9_F      | CCCTGGCTCTGGACCAGCC     | [69]      |
| mmp9_R      | CTGTGCGGCCCTCAGTGGTG    |           |
| mmp13_F     | CCGCCTGCTGGAGGAGACCA    |           |
| mmp13_R     | GACGGGCTCGGGTTCTGTGC    |           |

**Table S2.** Average of gene expression levels of zebrafish infected with *C. auris* and *C. haemulonii* at different timepoints, compared with the expression level of  $\beta$ -actin in each group.

| Genes                                             | <i>C. auris</i>    |                    |                 | <i>C. haemulonii</i> |                    |                 |
|---------------------------------------------------|--------------------|--------------------|-----------------|----------------------|--------------------|-----------------|
|                                                   | 8 hpi              | 96 hpi             | <i>P</i> value# | 8 hpi                | 96 hpi             | <i>P</i> value# |
| <b>Proinflammatory and inflammatory cytokines</b> |                    |                    |                 |                      |                    |                 |
| <i>tnfa</i>                                       | 1.57**             | 1.13 <sup>NS</sup> | 0.0077          | 1.04 <sup>NS</sup>   | 1.09 <sup>NS</sup> | 0.9579          |
| <i>ifng</i>                                       | 0.78*              | 0.40****           | 0.0007          | 0.81 <sup>NS</sup>   | 0.76 <sup>NS</sup> | 0.8620          |
| <i>il1b</i>                                       | 1.55**             | 0.70*              | 0.0003          | 0.78 <sup>NS</sup>   | 1.24 <sup>NS</sup> | 0.0443          |
| <i>il6</i>                                        | 0.88 <sup>NS</sup> | 1.47*              | 0.0130          | 1.14 <sup>NS</sup>   | 2.46****           | <0.0001         |
| <i>il8</i>                                        | 2.98****           | 0.84 <sup>NS</sup> | <0.0001         | 1.49**               | 1.03 <sup>NS</sup> | 0.0093          |
| <i>il10</i>                                       | 1.48*              | 1.01 <sup>NS</sup> | 0.0242          | 0.81 <sup>NS</sup>   | 1.52**             | 0.0394          |
| <i>il17a</i>                                      | 1.11 <sup>NS</sup> | 1.97**             | 0.0019          | 2.17***              | 1.24 <sup>NS</sup> | 0.0040          |
| <b>Leukocyte activities</b>                       |                    |                    |                 |                      |                    |                 |
| <i>inos</i>                                       | 0.78 <sup>NS</sup> | 1.87***            | <0.0001         | 0.68 <sup>NS</sup>   | 1.66**             | 0.0003          |
| <i>mpx</i>                                        | 1.09 <sup>NS</sup> | 1.22 <sup>NS</sup> | 0.4064          | 0.92 <sup>NS</sup>   | 3.06****           | <0.0001         |
| <b>Matrix metalloproteinases</b>                  |                    |                    |                 |                      |                    |                 |
| <i>mmp9</i>                                       | 0.39****           | 1.13 <sup>NS</sup> | <0.0001         | 1.95****             | 1.30****           | <0.0001         |
| <i>mmp13</i>                                      | 1.28 <sup>NS</sup> | 1.22 <sup>NS</sup> | 0.8342          | 1.36 <sup>NS</sup>   | 1.32 <sup>NS</sup> | 0.9638          |
| <b>Inflammatory regulators</b>                    |                    |                    |                 |                      |                    |                 |
| <i>myd88</i>                                      | 1.61*              | 0.95 <sup>NS</sup> | 0.0107          | 1.11 <sup>NS</sup>   | 1.10 <sup>NS</sup> | 0.9960          |
| <i>nfkb</i>                                       | 0.85 <sup>NS</sup> | 1.03 <sup>NS</sup> | 0.0353          | 1.29*                | 1.86***            | 0.0014          |
| <i>jak2</i>                                       | 2.16****           | 0.37***            | <0.0001         | 0.33***              | 0.21****           | 0.0342          |
| <i>stat3</i>                                      | 1.56*              | 1.19 <sup>NS</sup> | 0.0003          | 2.11***              | 1.49*              | <0.0001         |
| <b>Regulatory T-cells</b>                         |                    |                    |                 |                      |                    |                 |
| <i>foxp3a</i>                                     | 2.02***            | 0.87 <sup>NS</sup> | 0.0002          | 0.72 <sup>NS</sup>   | 2.44***            | <0.0001         |
| <i>foxp3b</i>                                     | 1.25*              | 0.82 <sup>NS</sup> | 0.0016          | 0.80 <sup>NS</sup>   | 1.41*              | 0.0001          |

**Note:** The normalized expression levels were analyzed with the Livak method ( $2^{-\Delta\Delta CT}$ ): < 1, downregulation; 1, basal; > 1, upregulation.

**Abbreviations and symbols:** hpi, hour post infection; Compared gene expression level with  $\beta$ -actin in each group: <sup>NS</sup>, not significant; \*,  $P < 0.5$ ; \*\*,  $P < 0.01$ ; \*\*\*,  $P < 0.001$ ; \*\*\*\*,  $P < 0.0001$ ; #, Comparison of expression level at different timepoint in each group.

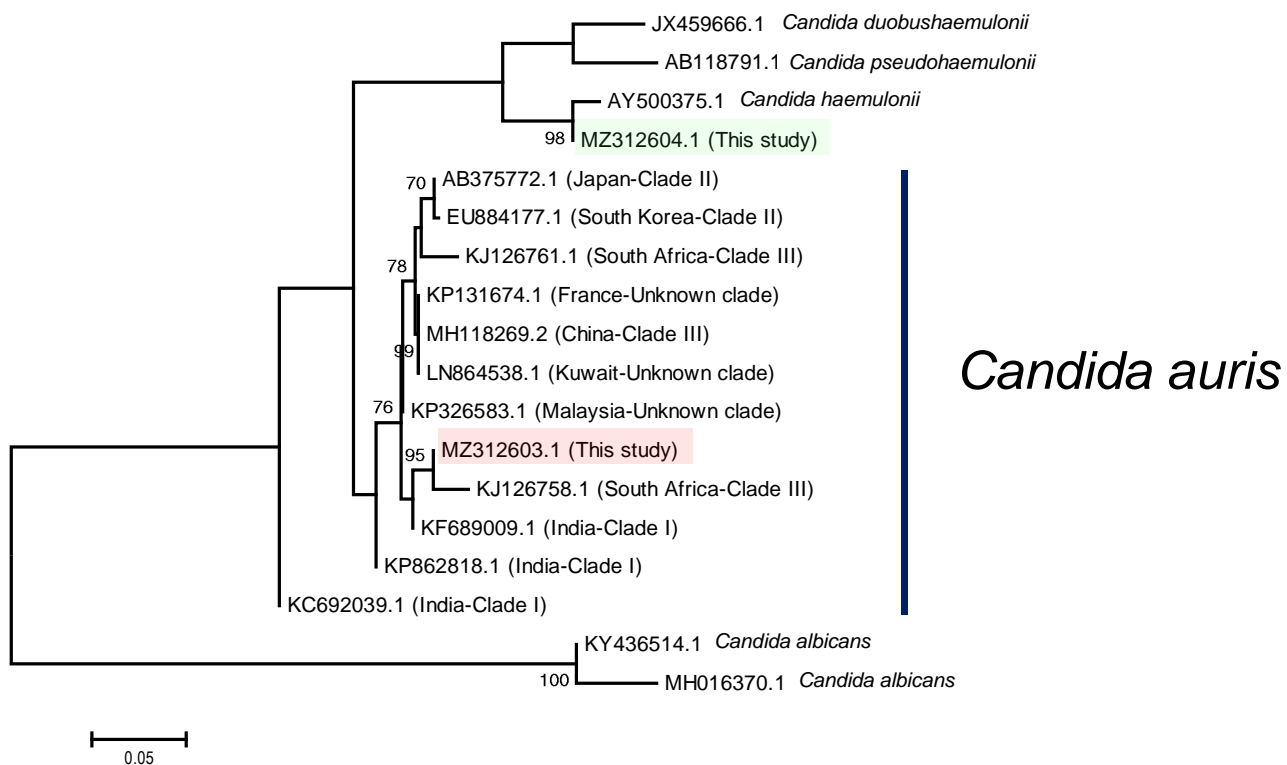

**Figure S1.** Phylogenetic tree using ITS sequences of emerging strains in this study (aligned by ClustalW and drawn by p-distance model and Neighbor-Joining with bootstrap analysis by MEGA program version 6). The information of ITS sequences in this analysis was adapted from [70].

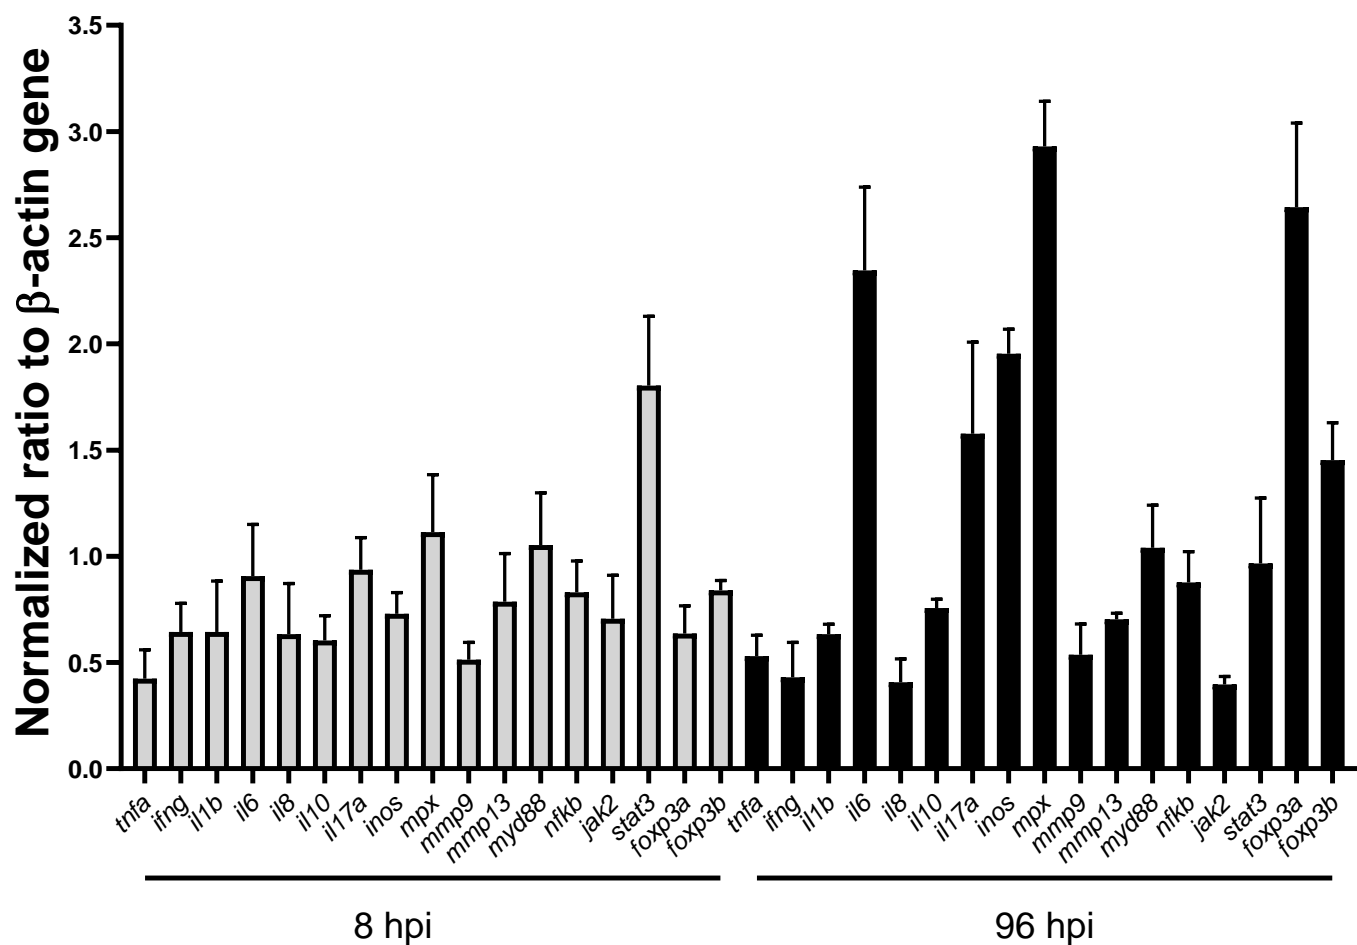

**Figure S2.** qPCR analysis of the gene expression levels in zebrafish infected with *Candida albicans* ATCC24433 as a control strain in this study. Each experimental group of 20 zebrafish was injected with  $10^7$  CFU yeast suspension. The normalized ratios of expression were calculated by comparison with the level of expression of the  $\beta$ -actin gene at 8 hpi. Each experiment was performed in triplicate. **Abbreviations:** hpi, hour-post-infection

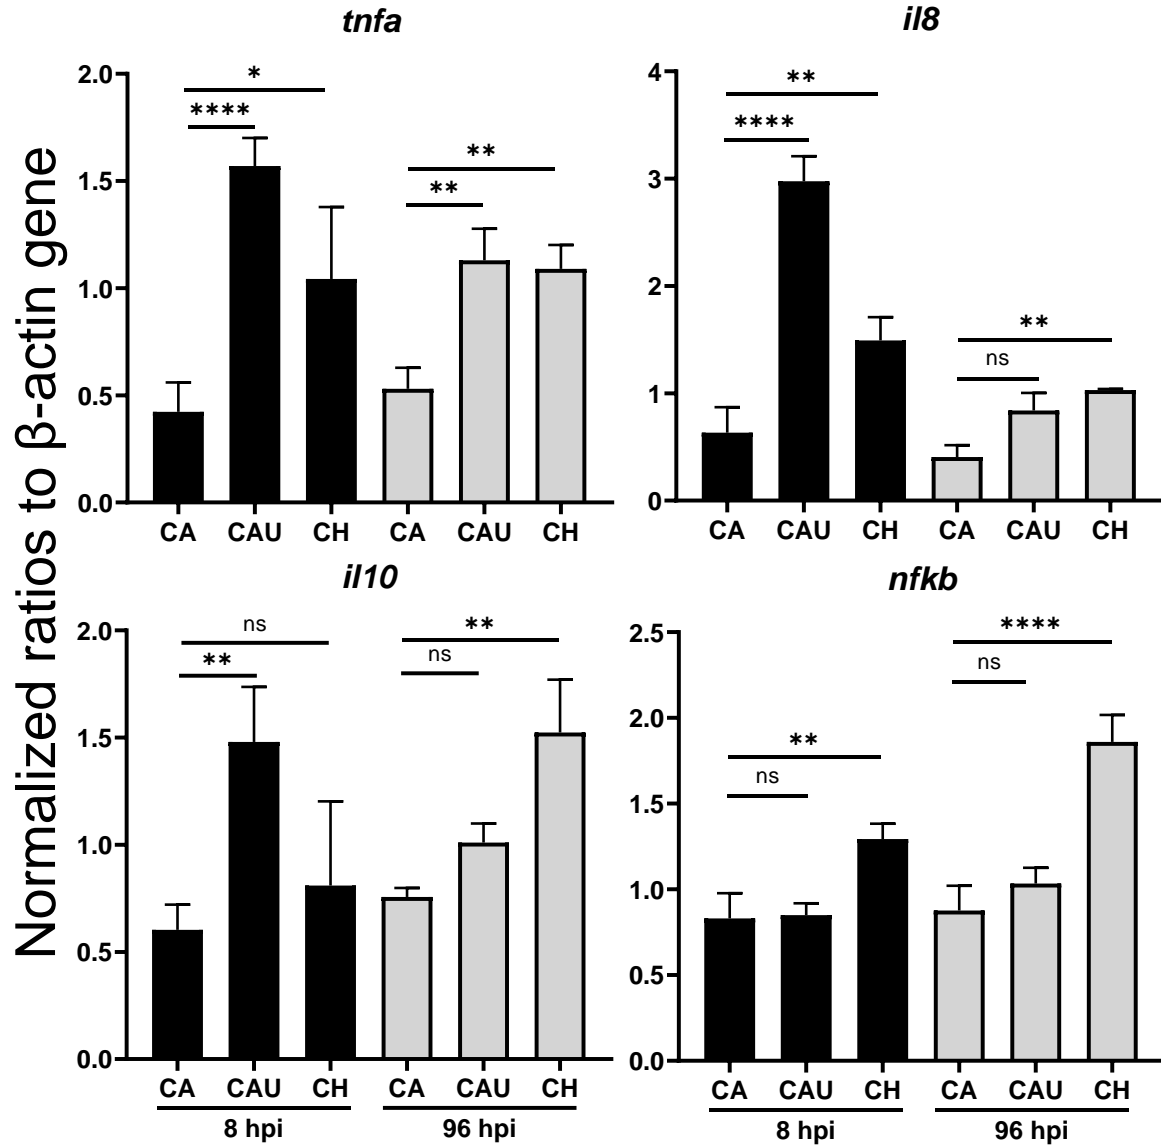

**Figure S3.** qPCR analysis indicating the high alterations of the expression levels of *tnfa*, *il8*, *il10*, and *nfkb* in zebrafish infected with emerging *Candida* strains. Each experimental group of 20 zebrafish was injected with  $10^7$  CFU cells of one of *C. albicans* ATCC24433 (CA), *C. auris* strain SI-18-CAU-HEM (CAU), or *C. haemulonii* strain SI-21-CH-PLF (CH). The normalized ratios of expression were calculated by comparison with the level of expression of the  $\beta$ -actin gene in each group at 8 hpi. Each experiment was performed in triplicate. **Abbreviations and symbols:** hpi, hour-post-infection; ns, not significant; \*,  $P < 0.05$ ; \*\*,  $P < 0.01$ ; \*\*\*,  $P < 0.001$ ; \*\*\*\*,  $P < 0.0001$ .
